# Supplementary material for: Diverse gene reprogramming events occur in the same spatial clusters of distal regulatory elements
Source: HighWire-hosted journal article supplement (doi:10.1101/gr.111153.110), 2011-04-06
Supplement: Hakim_111153_supplementary_material.pdf [file Hakim_111153_supplementary_material.pdf]

## Hakim - Supplementary Figure S1

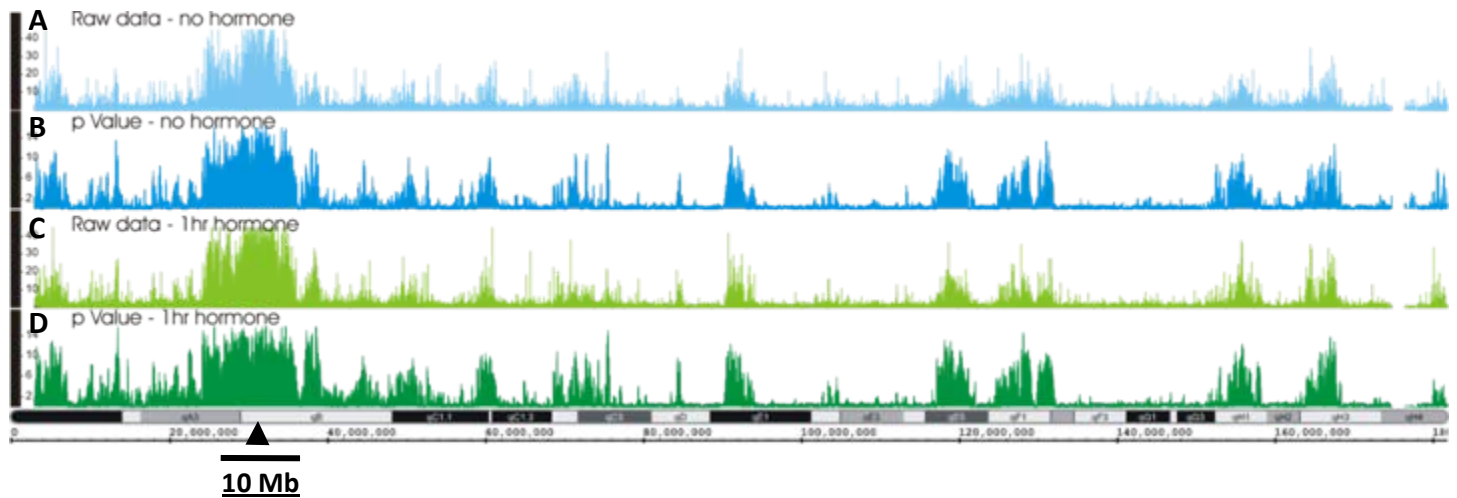

**Figure S1. *Lcn2* long- range contacts on chromosome 2.** Unprocessed log2 (4C/genomic control) hybridization signals (**A,C**, raw data), together with statistical analysis (**B,C**, p-value). Peaks represent interactions of *Lcn2* (*chr 2*: 32.2 Mb, black arrowhead) with loci on chromosome 2, before and one hour after hormone induction. Note the distinctively strong contact frequency of *Lcn2* with the ~10 Mb surrounding region. This 10 Mb region was excluded from all the genome-wide correlation analysis. Genomic position in mm8 coordinates is indicated on the horizontal axis.

## Hakim - Supplementary Figure S2

**A**

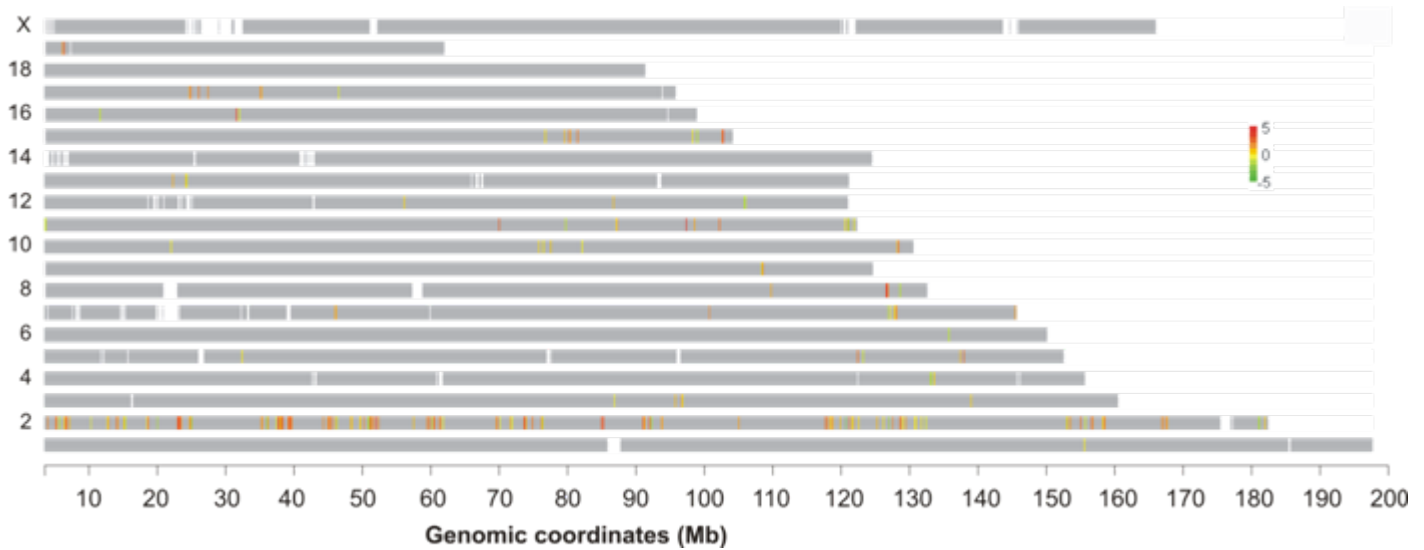

**B**

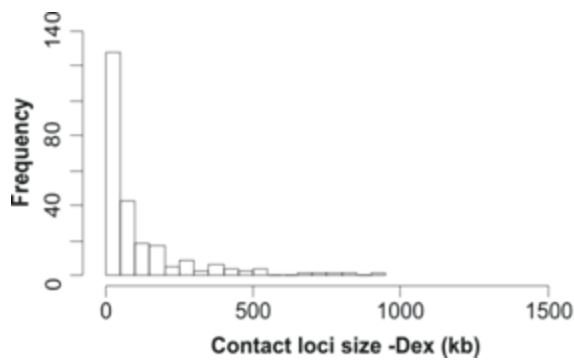

**C**

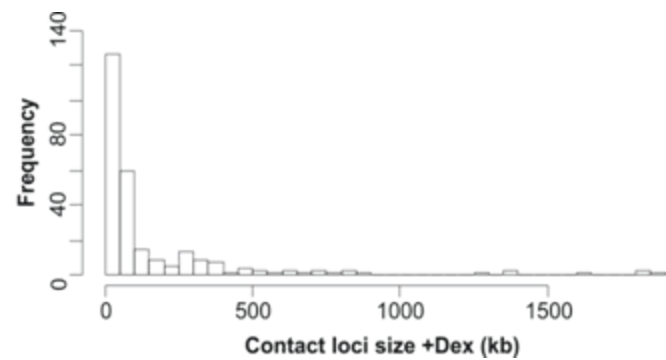

**Figure S2. A. Genomic map of *Lcn2* differential contacts between the none-induced and the one hour Dex induced cells.** Probes that show p-score change more than 4.5 between the two conditions were plotted. Probes with increased value are plotted in yellow-red scale, probes that show decrease in their p-score are plotted in green scale according to the  $\text{Log}_2$  (+Dex/-Dex) ratios. Probes that did not show change or a change below threshold, were plotted in gray. Genomic position in mm8 coordinates is indicated on the horizontal axis. **B.C. *Lcn2* 4C interacts with genomic loci with various sizes.** Contact loci were grouped into 50 kb bins and the number of loci in each bin is presented. B and C represent the contact size distribution before and after hormone induction respectively.

# Hakim - Supplementary Figure S3

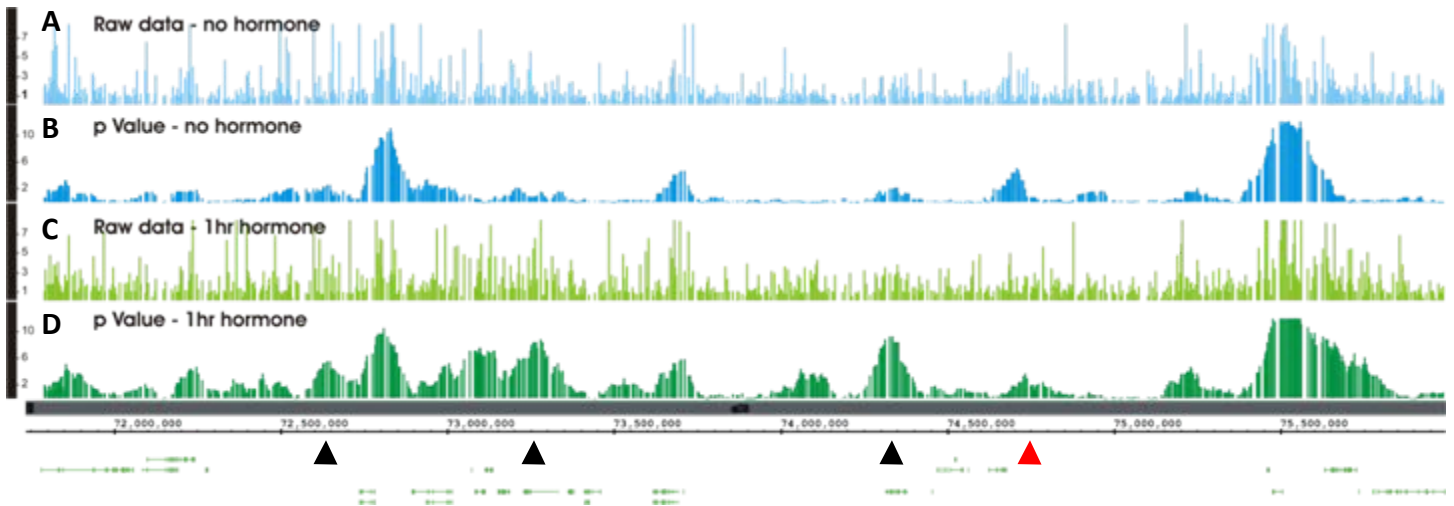

**Figure S3. Long range contacts with *Lcn2* on chromosome 2:71.8Mb-75.9Mb.** Unprocessed log2 (4C/genomic control) hybridization signals (**A,C**, raw data) together with statistical analysis (**B,C**, p-value) showing interactions of *Lcn2* (chr 2: 32.2 Mb) with loci on chromosome 2, before and one hour after hormone induction. Probes with p-value greater than 4 were scored as positive. Note that in general, the contacts are more frequent in response to GR activation by Dex (wider and taller peaks). Some contacts increase above statistical threshold (P-value=4) in response to GR activation (black arrowhead) and some contacts show decrease frequency (red arrowhead). Genomic position in mm8 coordinates is indicated on the horizontal axis.

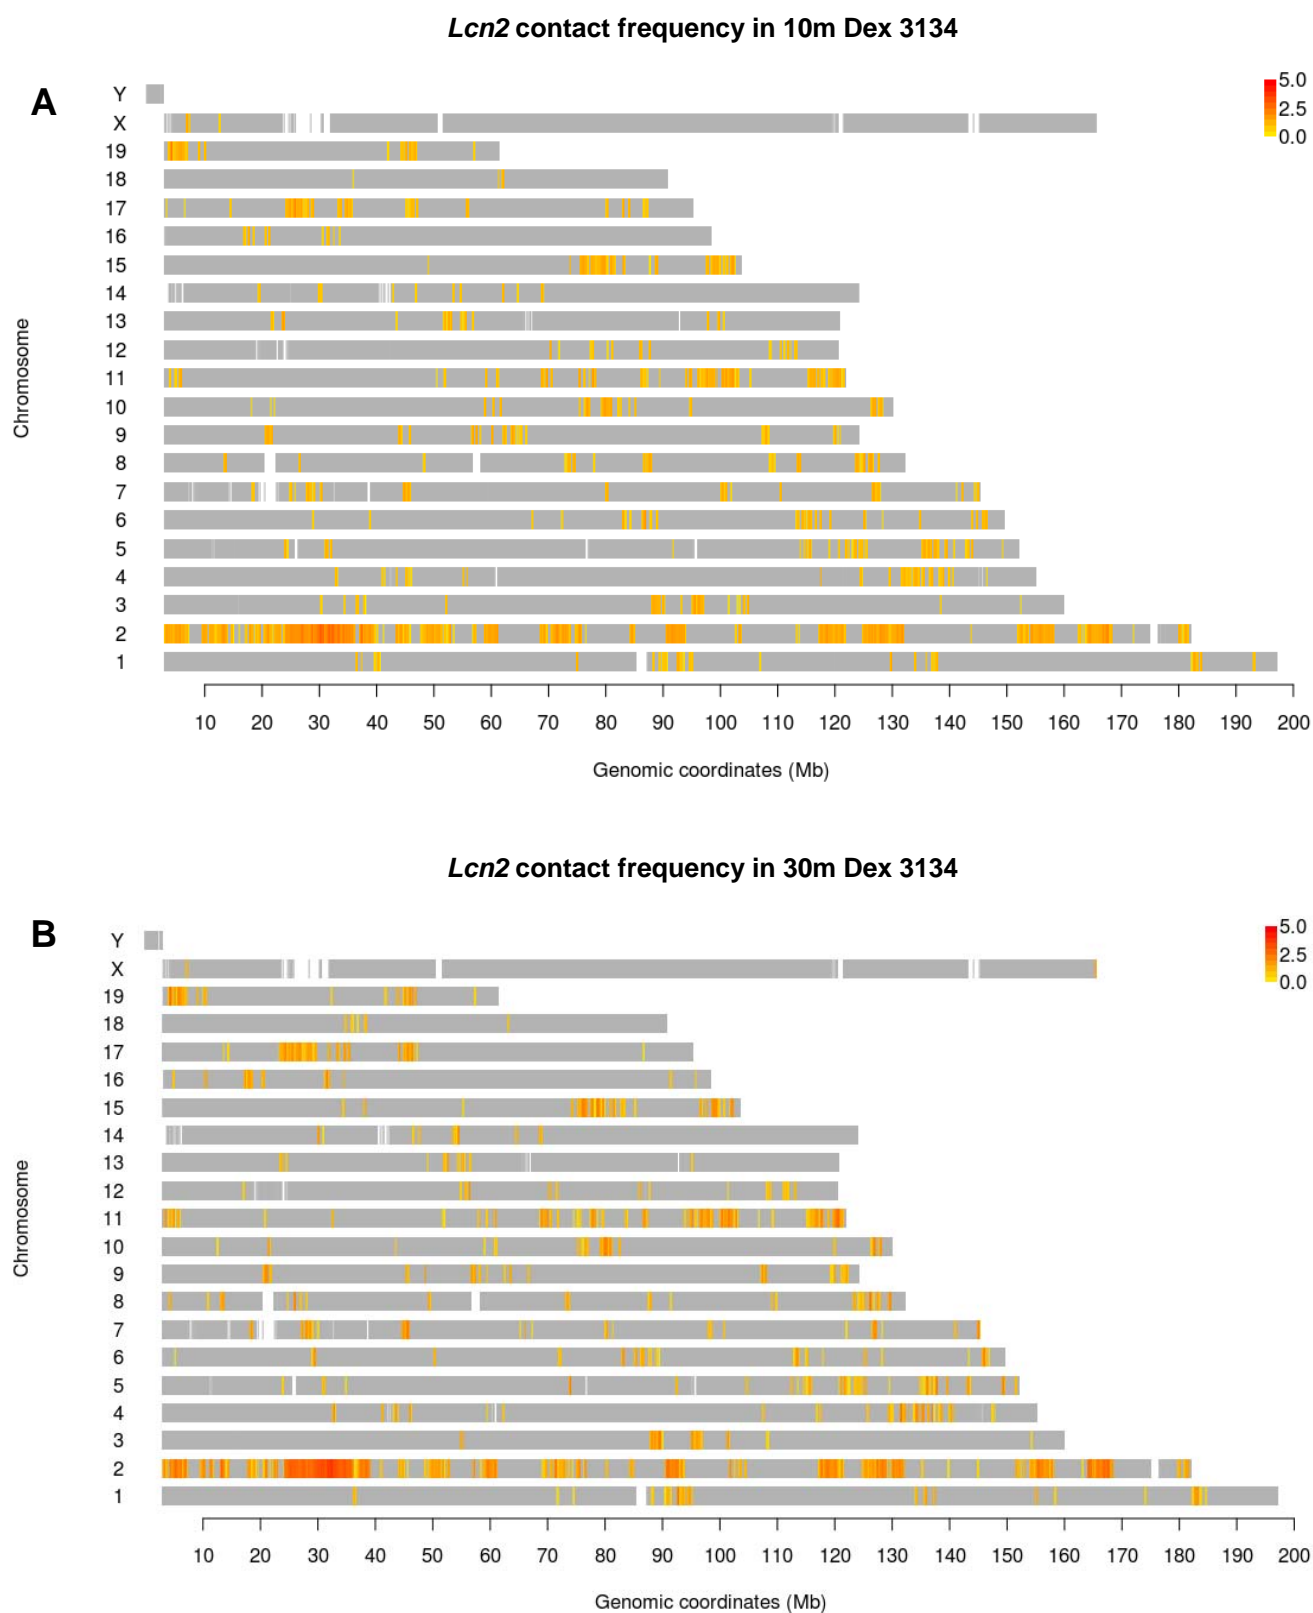

**Figure S4. High temporal resolution of *Lcn2* interactions across the mouse genome in mammary cell line.** Genomic map of *Lcn2* contacts ten minutes (A) and thirty minutes (B) after induction by Dex. Probes with p value above the threshold ( $p \text{ score} = -\log_{10} p > 4$ ; 0.3 % FDR) are marked in a yellow-to-red color scale according to the intensity of the probe signal ( $\log_2 4C/\text{genomic DNA}$ ). Probes with p value below the threshold are marked in gray. Genomic position in mm8 coordinates is indicated on the horizontal axis.

# Hakim - Supplementary Figure S5

**A**

Chr2 *Lcn2* region

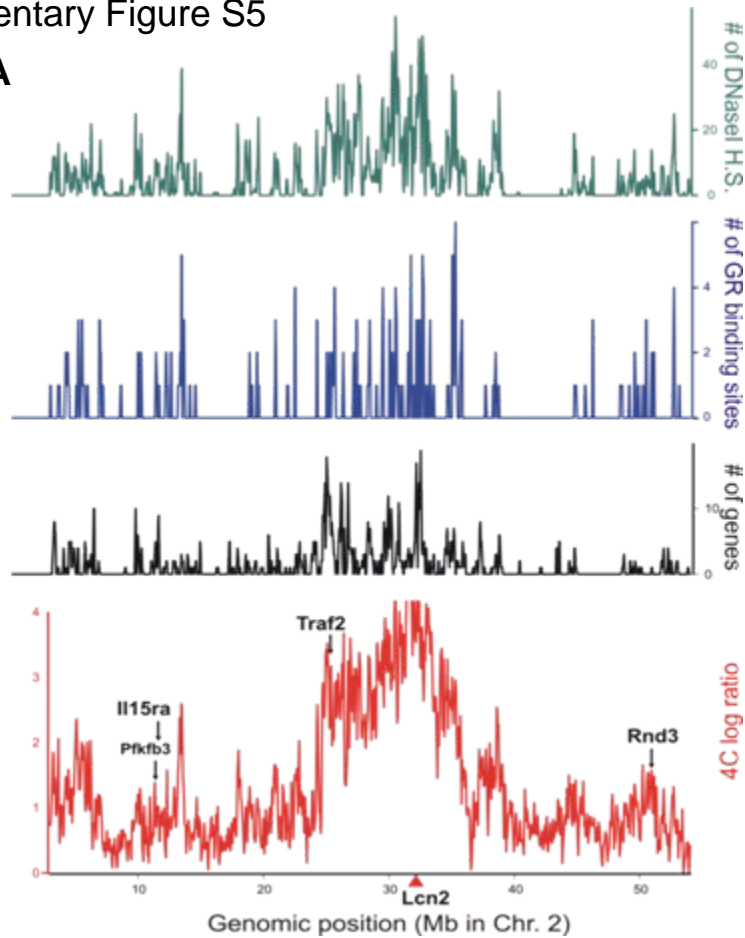

**B**

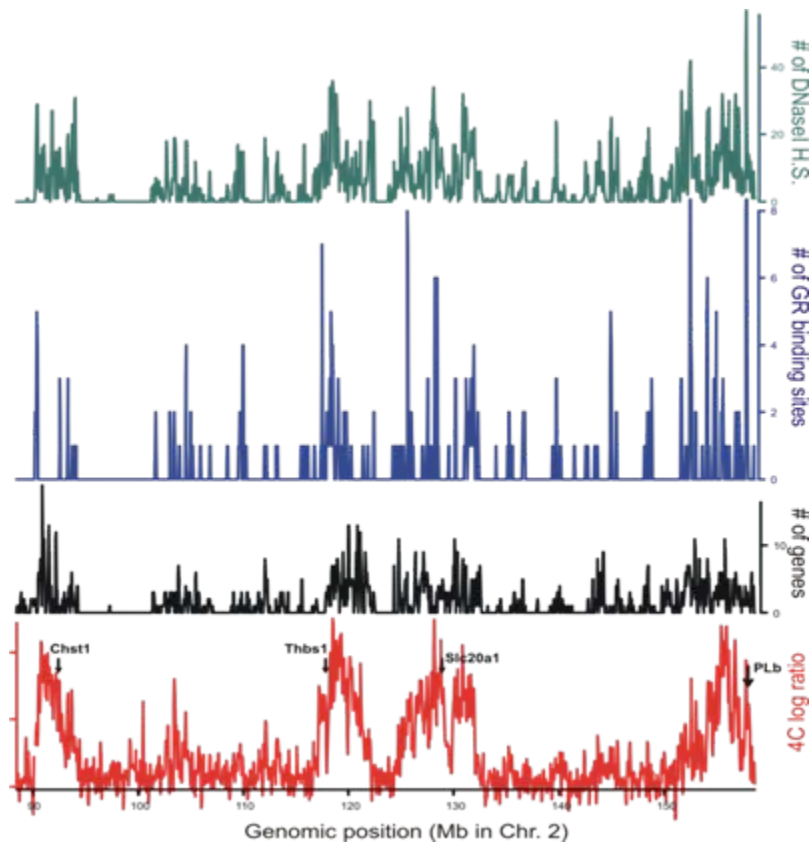

**Figure S5. Examples of smoothed data profiles from cells induced with dex for one hour, using *Lcn2* as the bait. A,B. Examples on chromosome 2 (cis chromosome).** 4C profiles (average log<sub>2</sub> ratios/100kb) are presented in red, gene density (TSS /100kb) in black, GR binding density (binding sites/100kb) in blue and DHS density (DHS /100kb) in green. Genomic position is indicated on the horizontal axis. The location of GR regulated genes is marked with black arrows. Genomic position in mm8 coordinates is indicated on the horizontal axis.

# Hakim - Supplementary Figure S5

**C**

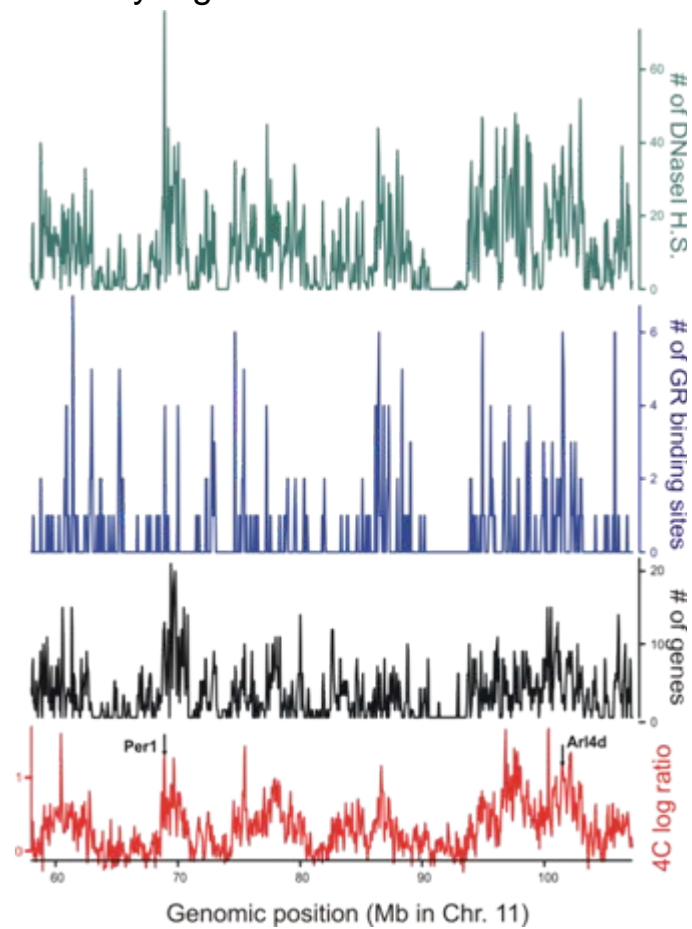

**D**

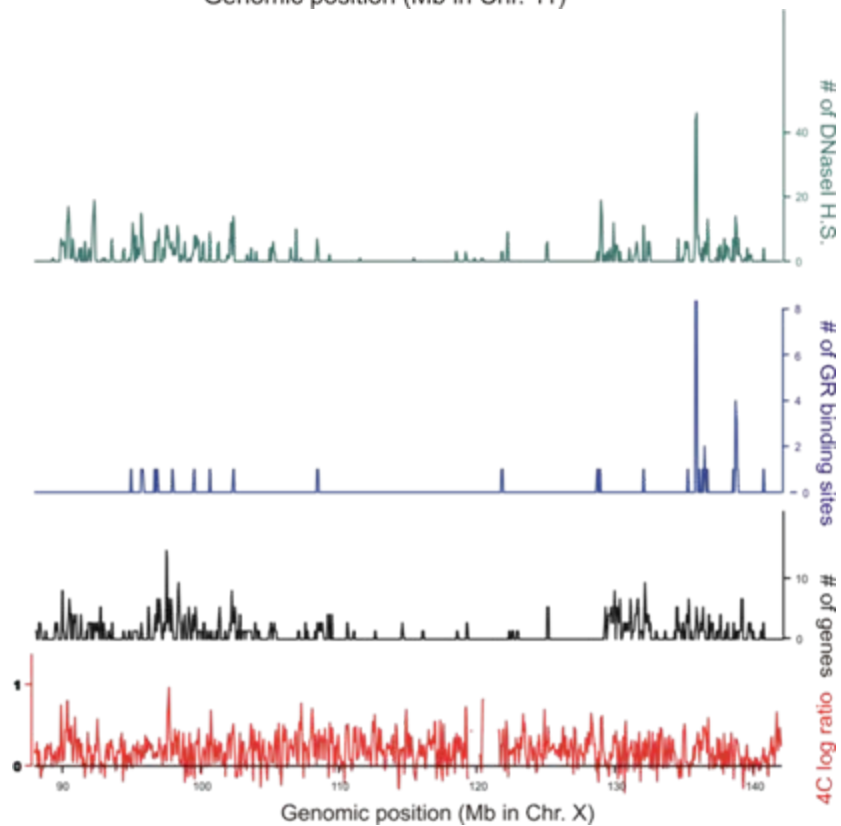

**Figure S5. C.** Example for positive contact region on chromosome 11. **D.** Example for negative contact region on chromosome X

# Hakim - Supplementary Figure S5

E

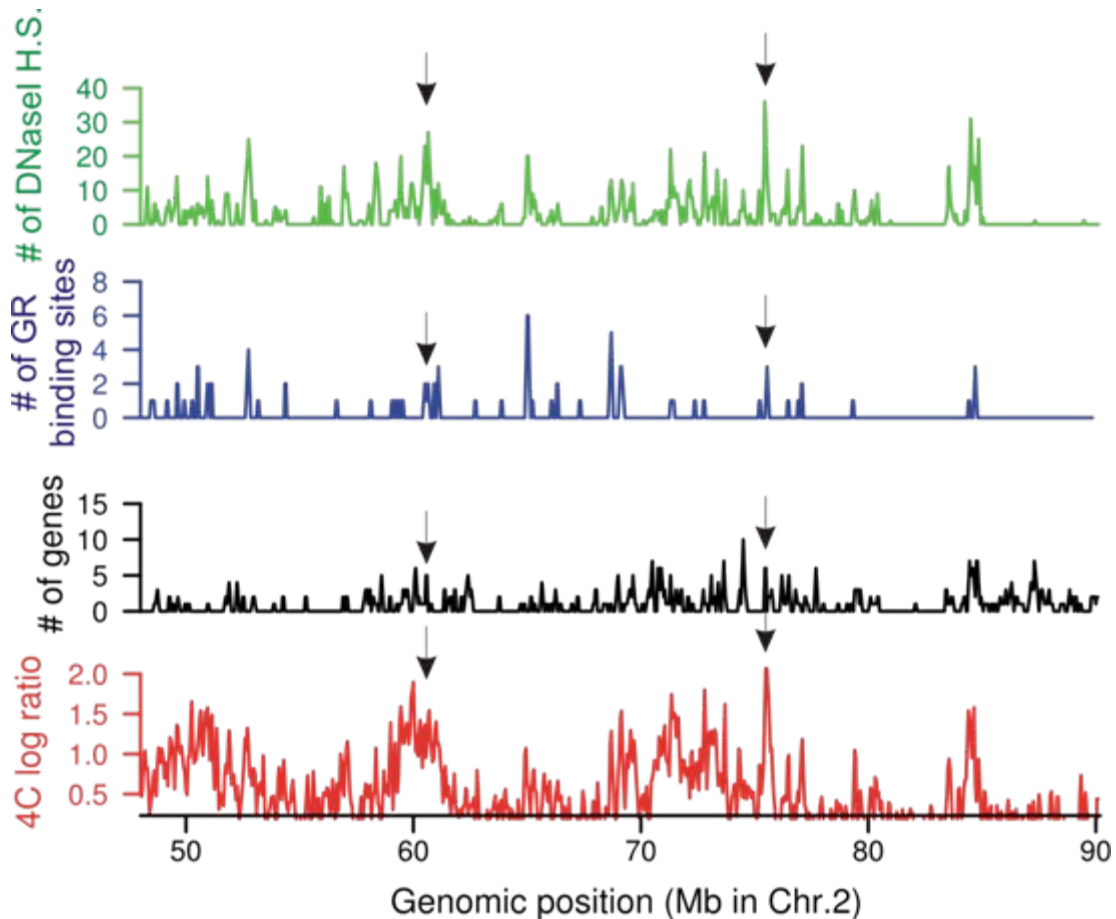

**Figure S5. E. Example for contact region on chromosome 2 demonstrating the prevalence of GR binding and DHS sites over gene density in the contact loci.** Arrows point to contact regions in gene-poor regions that have numerous clustered GR binding sites and DHS.

# Hakim - Supplementary Figure S6

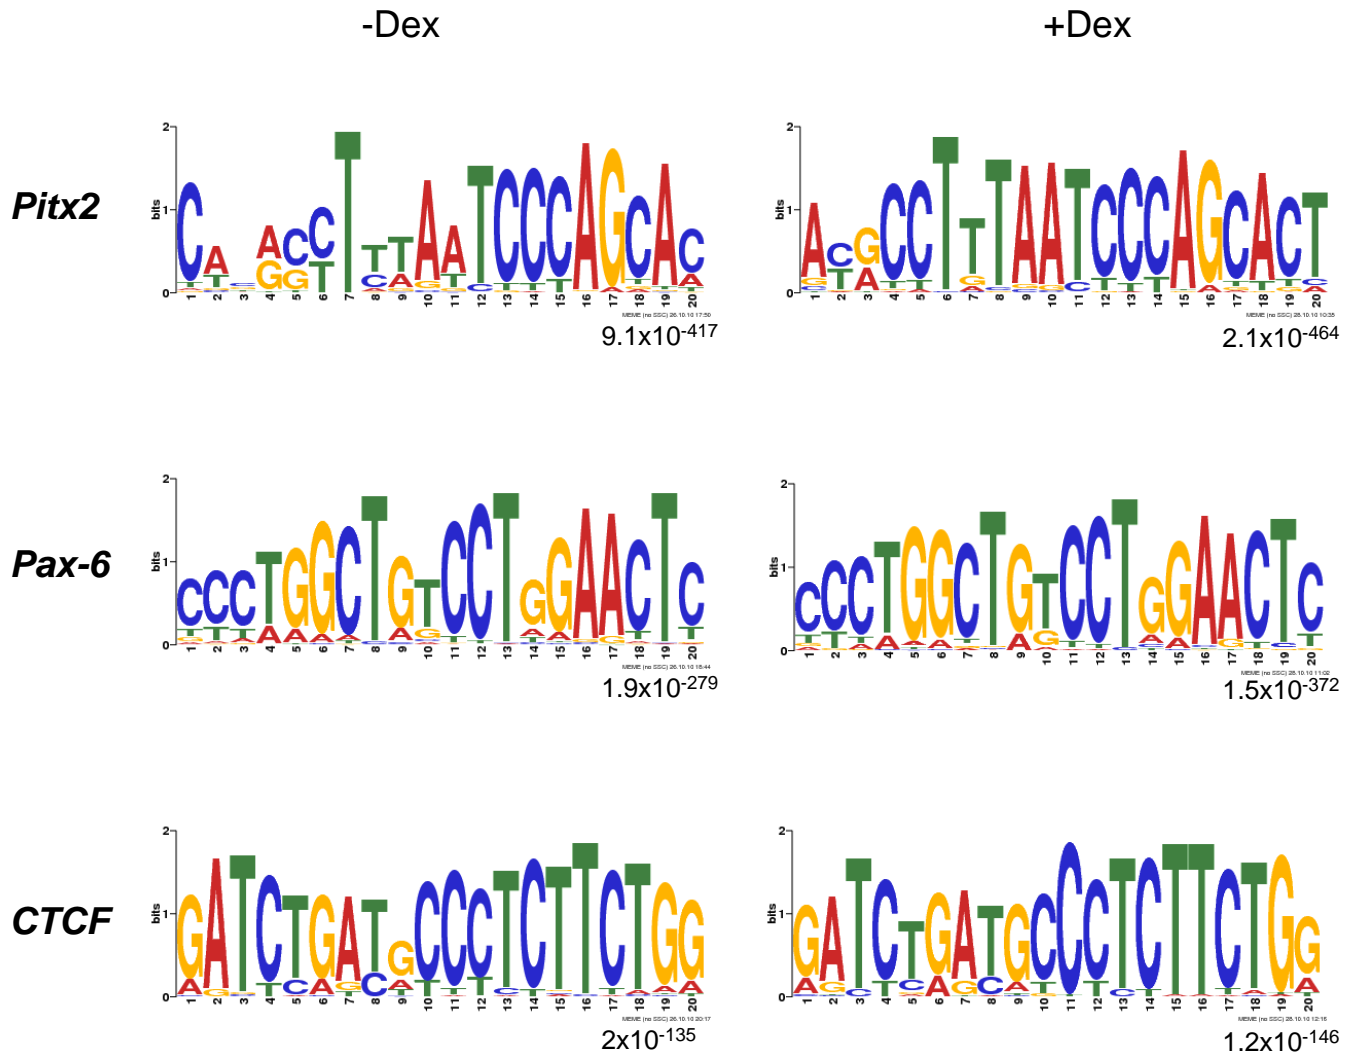

**Figure S6. Enriched motifs discovered by MEME analysis on DHS sites near *Lcn2* contact regions.** The DHS sites within 10 kb of positive probes from *Lcn2* 4C data were sorted by their DNaseI hypersensitivity (tag density of DHS-seq). Top 1,500 sites were obtained separately for Dex treated and untreated conditions and used as input to the MEME program. Enriched motifs from MEME were queried against the TRANSFAC database using the Tomtom program to identify matches to known transcription factor binding motifs. The number below each logo is the e-value from the MEME algorithm.



# Hakim Supplementary Figure S7

**A**

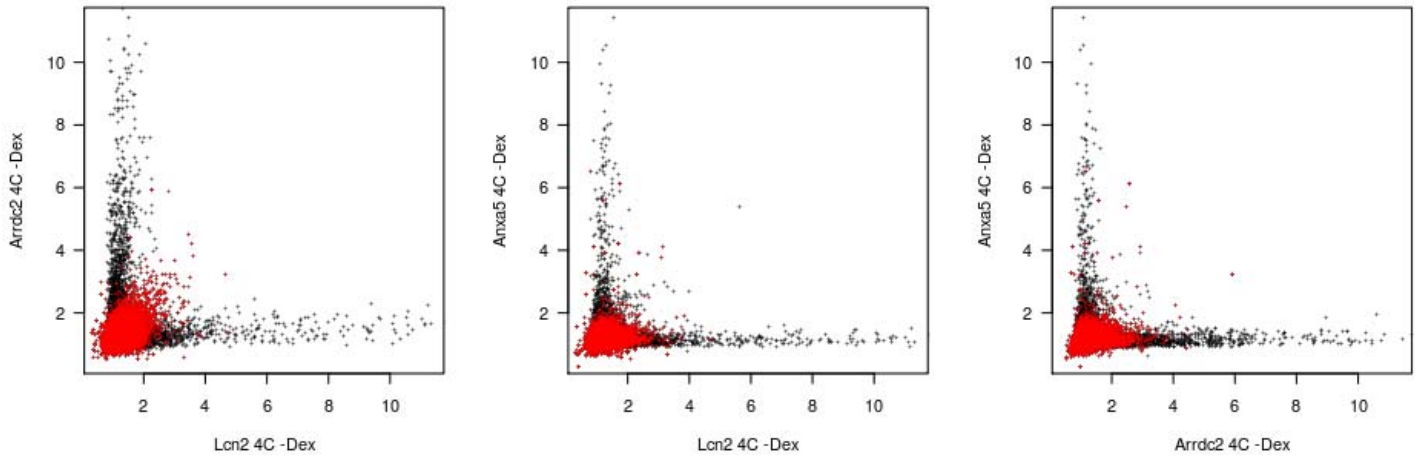

**B**

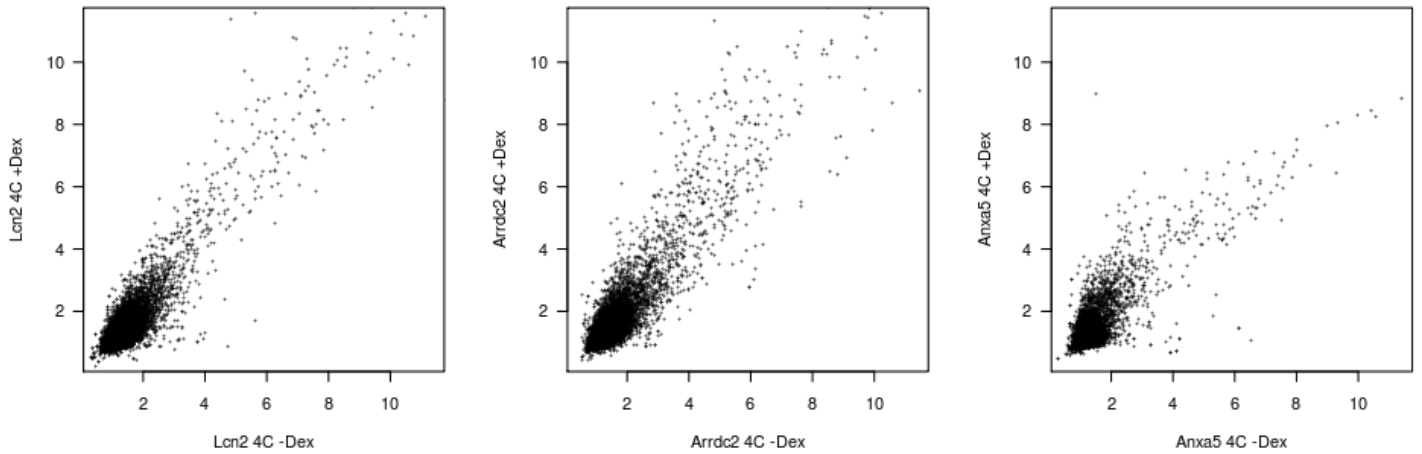

**Figure S7. Comparison of 4C signal from different baits and different conditions.** Each profile was obtained by averaging the 4C logratios over a 100 kb window sliding along the genome in 50 kb increments. **A.** Pairwise comparisons of the 4C profiles from the baits *Lcn2*, *Arrdc2*, *Anxa5* in untreated cells. The inter-chromosomal contacts (trans) are indicated in red color. These plots indicate that the subnuclear environments at the three bait loci have few mutual interactions. **B.** Each plot shows the 4C profiles after Dex versus before Dex for a given bait, showing a global correlation between contact frequency patterns before/after Dex.

Hakim - Supplementary Figure S8

A

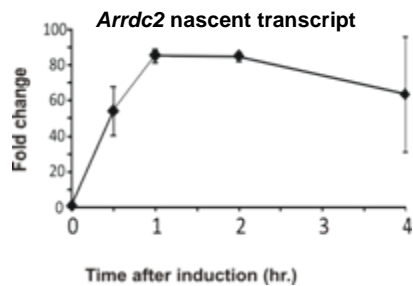

B

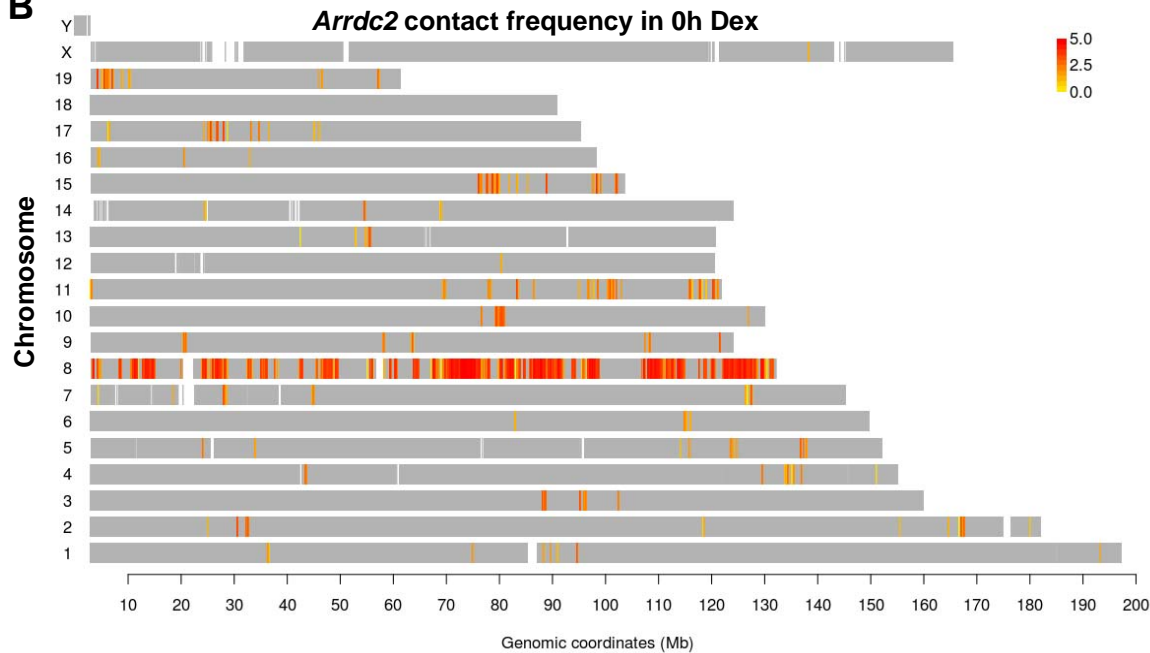

C

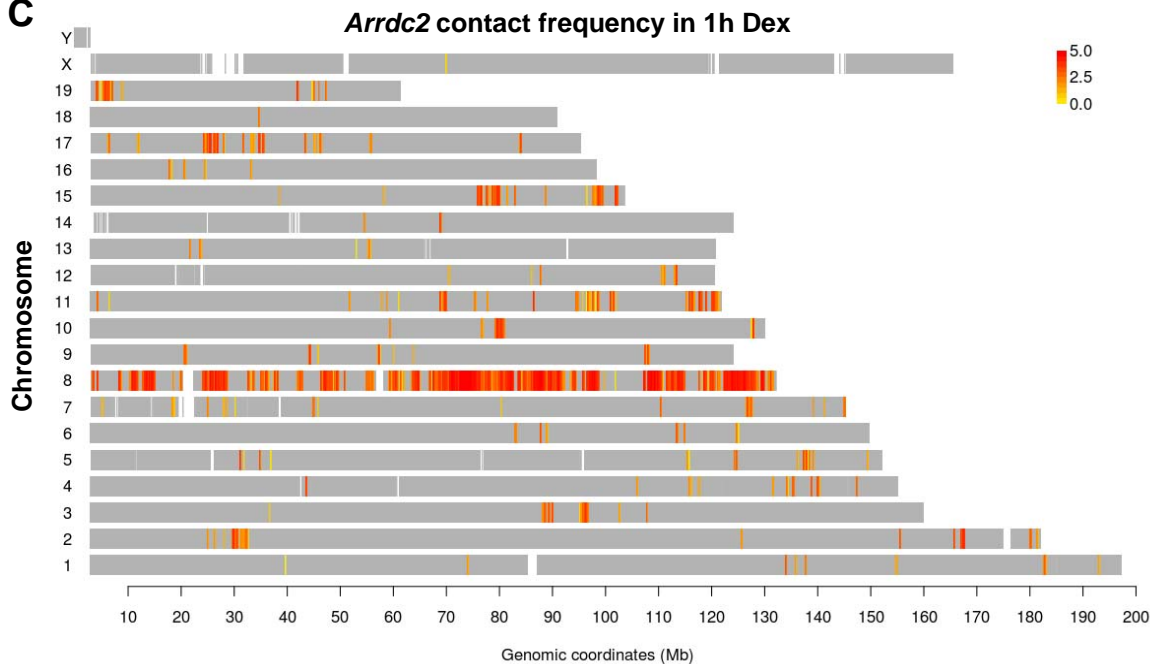

**Figure S8. *Arrdc2*, GR induced gene, interactions across the mouse genome in mammary cell line.** A Time course analysis by qRT-PCR of nascent transcript levels of *Arrdc2*. Samples were collected before Dex treatment (0) and 0.5,1,2,4 hours after Dex induction. Results shown are the average of three independent experiments, SD is presented. Genomic map of *Arrdc2* (chr8:73,764,127-73,768,709) contacts before (B) and one hour after (C) induction by Dex. Probes with p value above the threshold ( $p \text{ score} = -\log_{10} p > 4$ ; 0.3 % FDR) are marked in a yellow-to-red color scale according to the intensity of the probe signal ( $\log_2 4C/\text{genomic DNA}$ ). Genomic position in mm8 coordinates is indicated on the horizontal axis.

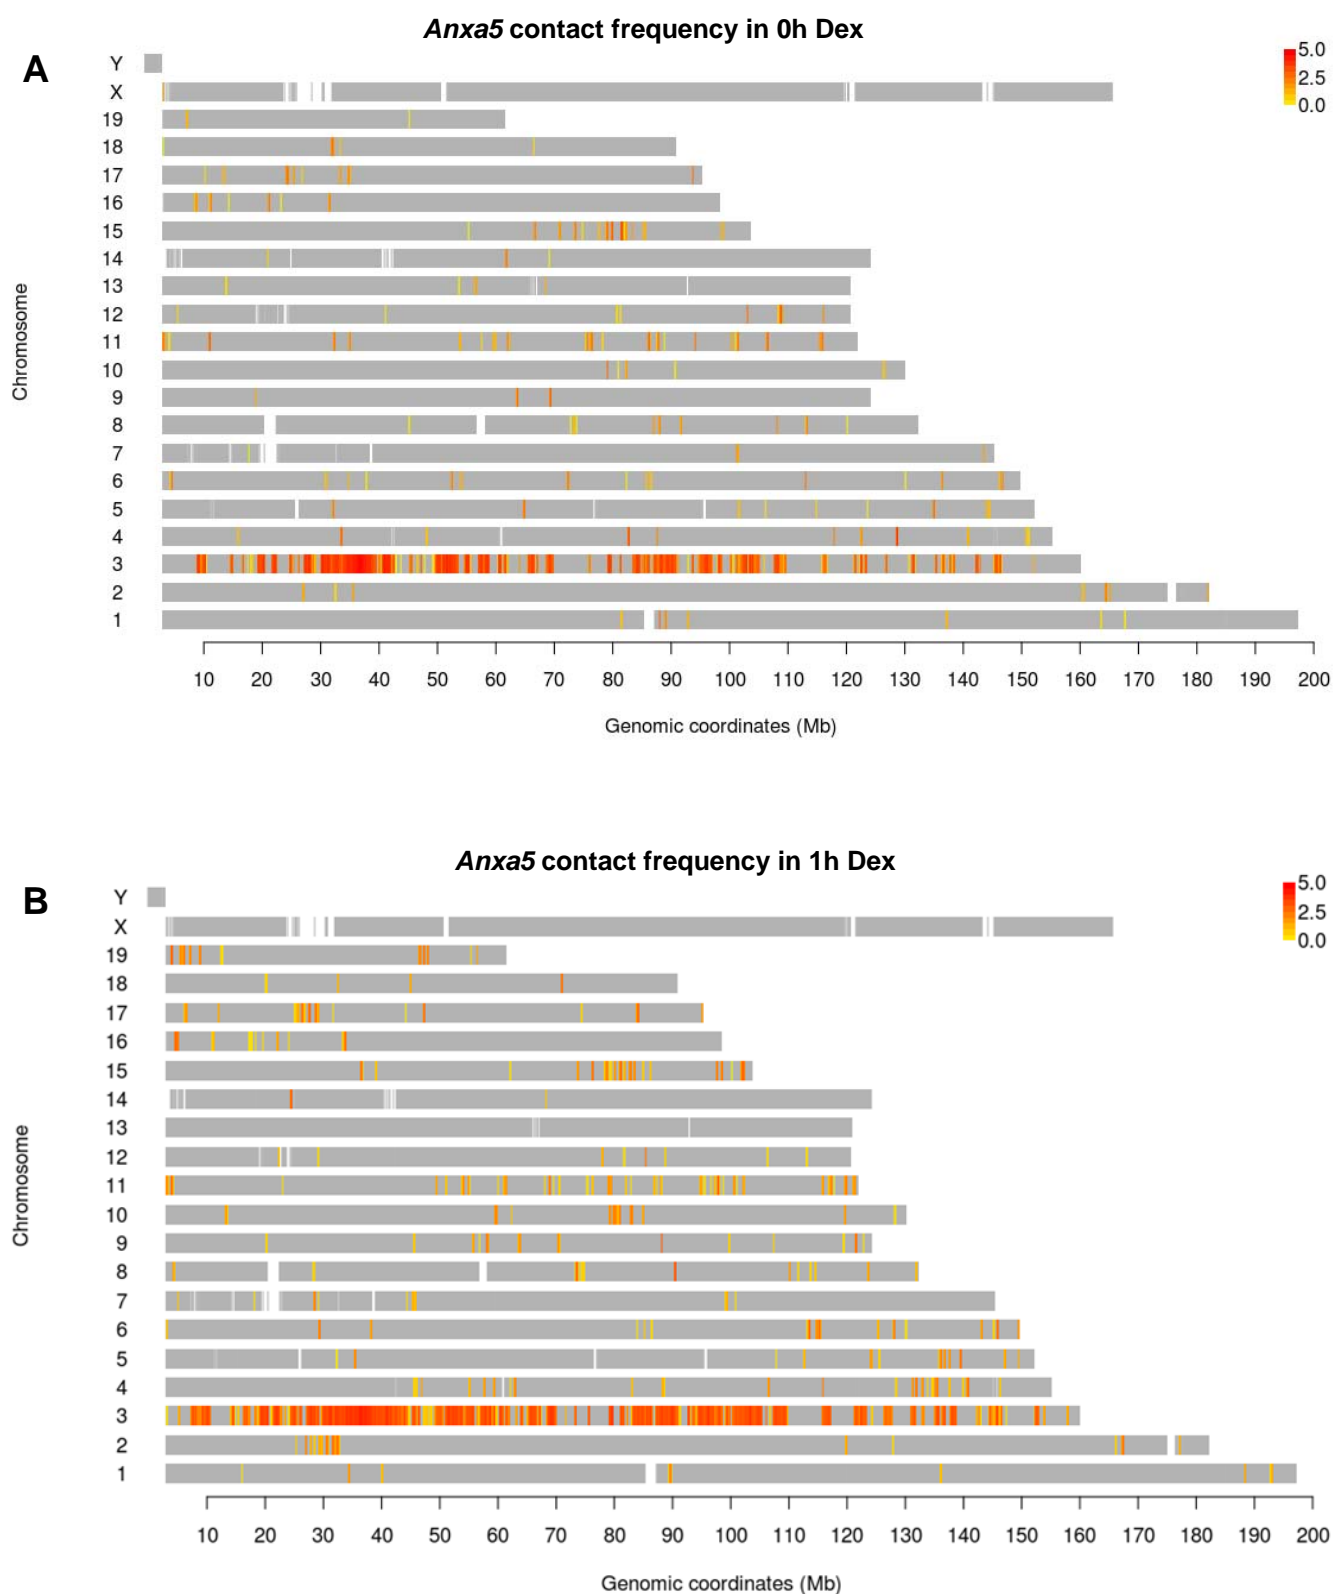

**Figure S9. *Anxa5* interactions across the mouse genome in mammary cell line.** Genomic map of *Anxa5* (chr3:36,640,475-36,667,247) contacts before (A) and one hour after (B) induction by Dex. Probes with p value above the threshold ( $p \text{ score} = -\log_{10} p > 4$ ; 0.3 % FDR) are marked in a yellow-to-red color scale according to the intensity of the probe signal ( $\log_2 4C/\text{genomic DNA}$ ). Genomic position in mm8 coordinates is indicated on the horizontal axis.

# Hakim - Supplementary Figure S10

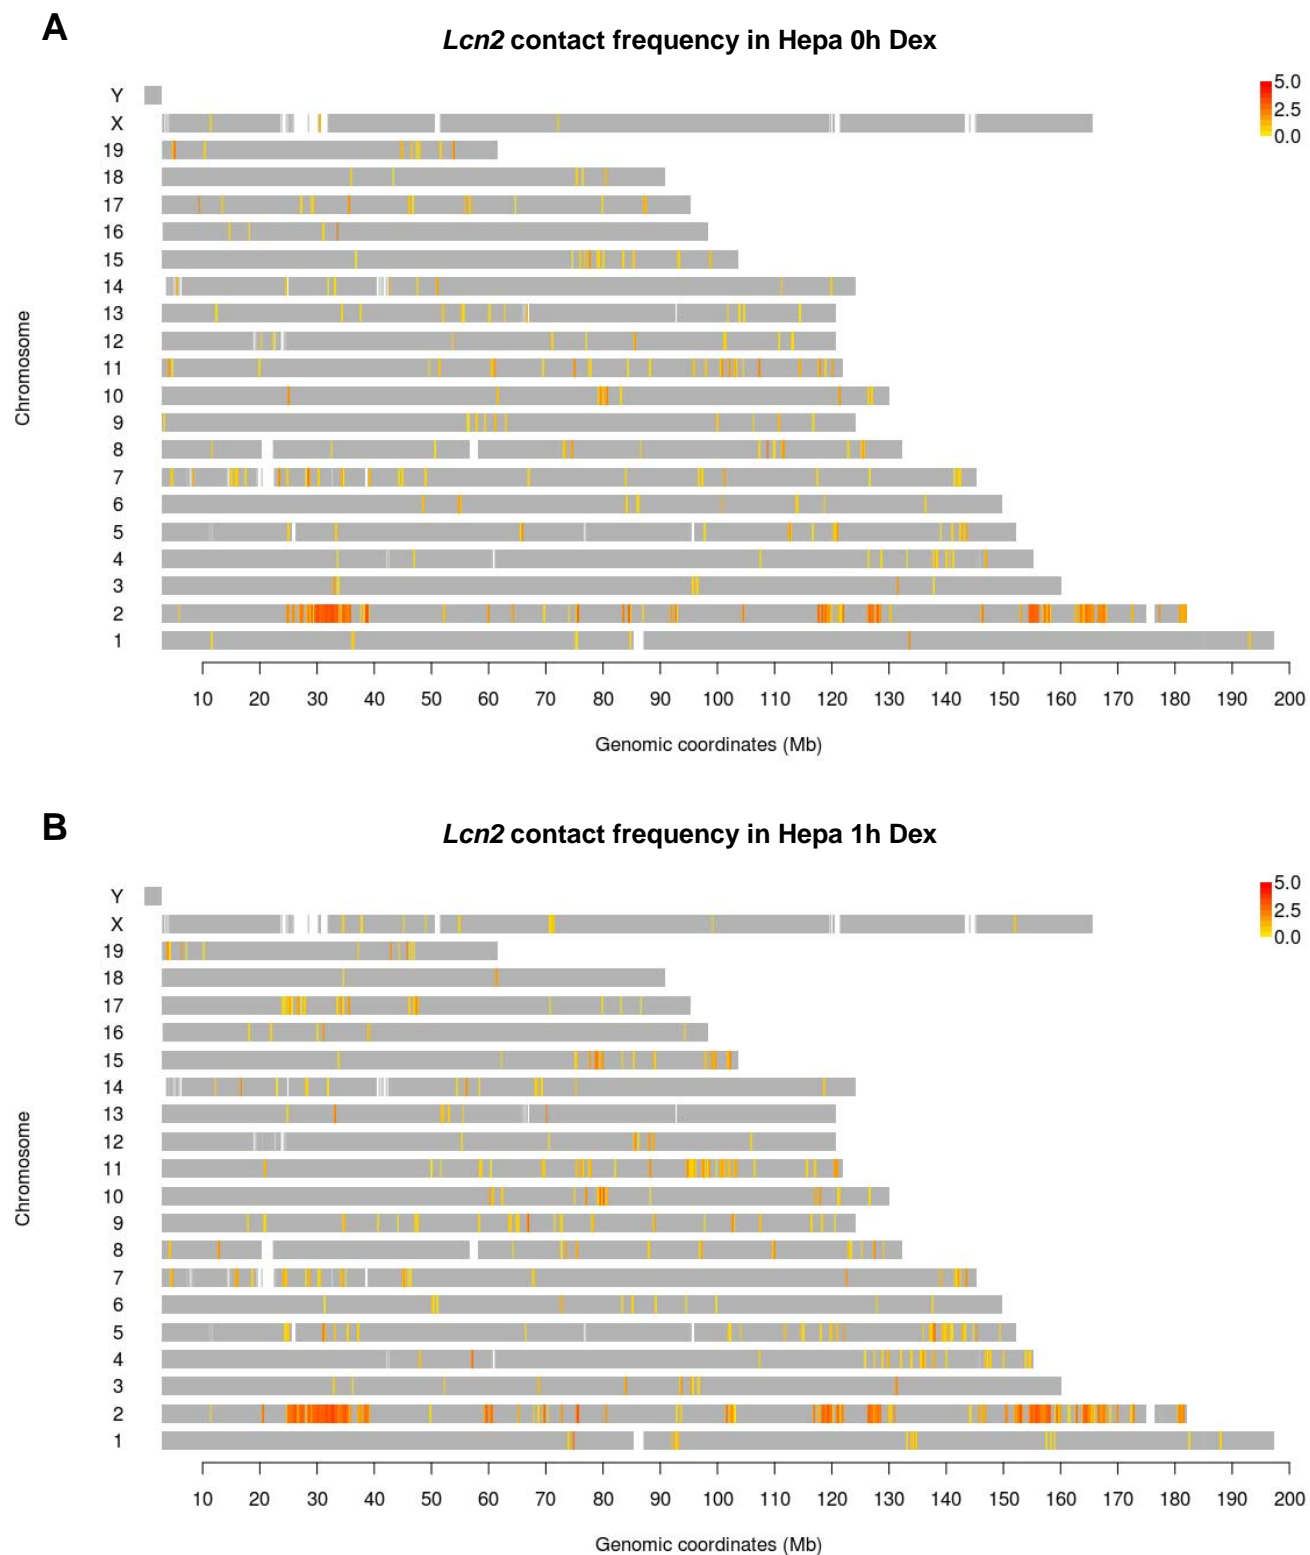

**Figure S10. *Lcn2* interactions across the mouse genome in Hepa1C1C7 cell line.** Genomic map of *Lcn2* contacts before (**A**) and one hour (**B**) after induction by Dex. Probes with p value above the threshold ( $p \text{ score} = -\log_{10} p > 4$ ; 0.3 % FDR) are marked in a yellow-to-red color scale according to the intensity of the probe signal ( $\log_2 4C/\text{genomic DNA}$ ). Probes with p value below the threshold are marked in gray. Genomic position in mm8 coordinates is indicated on the horizontal axis.

## Hakim - Supplementary tables legends

Table S1

Gene content, expression and Dex response in the robust 101 *Lcn2* contact regions before Dex induction.

Table S2

Gene content, expression and Dex response in the robust 121 *Lcn2* contact regions one hour after Dex induction.

## Hakim - Supplementary Table 3

| Bac | Position<br>chromosome(Mb) | FISH %<br>-Dex | FISH %<br>+Dex | 4C<br>-Dex | 4C<br>+Dex | # cells<br>-Dex | # cells<br>+Dex |
|-----|----------------------------|----------------|----------------|------------|------------|-----------------|-----------------|
| A   | 2 (164.5)                  | 24.05          | 19.93          | 61.56      | 55.85      | 237             | 311             |
| B   | 2 (157.8)                  | 10.56          | 17.64          | 22.87      | 42.90      | 161             | 204             |
| C   | 2 (141.2)                  | 2.88           | 2.91           | -6.15      | -1.11      | 416             | 378             |
| D   | 8 (126.1)                  | 7.35           | 11.43          | 16.89      | 39.04      | 381             | 376             |
| E   | 9 (107.9)                  | 4.46           | 8.86           | 11.08      | 22.85      | 964             | 959             |
| F   | 12 (86.1)                  | 5.09           | 5.49           | 8.64       | 18.87      | 491             | 601             |
| G   | 12 (105.4)                 | 6.73           | 2.30           | 17.02      | 10.99      | 282             | 261             |
| H   | 15 (102.1)                 | 6.54           | 8.55           | 25.00      | 28.94      | 688             | 222             |
| I   | 15 (20.3)                  | 0.43           | 0.00           | 5.91       | 2.37       | 232             | 247             |

**Table S3.** Interaction frequencies between *Lcn2* and selected loci are presented as the percentage of cells with two signals closer than 0.8 micron (FISH%) without (-dex) or one hour after dex induction (+dex). 4C interaction probability is the sum of 4C probes value (log2 4C/genomic) over the BAC region.

## Hakim - Supplementary Table S4

| Primer name  | Gene           | Primer sequence       |
|--------------|----------------|-----------------------|
| Unc13d_nc_F  | <i>Unc13d</i>  | GTGCCACCTTCAGTTCCAGT  |
| Unc13d_nc_R  | <i>Unc13d</i>  | CCATGCCAGGTATAGCCAGT  |
| Aqp5_nc_F    | <i>Aqp5</i>    | TGGAGCAGGCATCCTGTACT  |
| Aqp5_nc_R    | <i>Aqp5</i>    | AGCATGGAAGGTCTGGTCTG  |
| Rpp38_nc_F   | <i>Rpp38</i>   | AGACATGCATTGCTGACAGG  |
| Rpp38_nc_R   | <i>Rpp38</i>   | TCCGAATAGATCCCCCTTTG  |
| Bcl2l_nc_F   | <i>Bcl2l</i>   | GGTGAGTCGGATTGCAAGTT  |
| Bcl2l_nc_R   | <i>Bcl2l</i>   | ACAAGGGGCGTGTTCTTAC   |
| Tmed1_nc_F   | <i>Tmed1</i>   | TTAACCCAGGCTTTCTGTGG  |
| Tmed1_nc_R   | <i>Tmed1</i>   | AAGGTGAAGTCCACGTCCAG  |
| Traf2_nc_2F  | <i>Traf2</i>   | AAGAAGATCCCTCGGGAGAC  |
| Traf2_nc_2R  | <i>Traf2</i>   | AAGAACATGCCCATCGTAGC  |
| Chst1_nc_F   | <i>Chst1</i>   | TGGCTGTGTGAAGCACCTAC  |
| Chst1_nc_R   | <i>Chst1</i>   | GCCTTCCAAGAACATTGCAT  |
| Slc20a1_nc_F | <i>Slc20a1</i> | TGTATTGTCGGTGCAACCAT  |
| Slc20a1_nc_R | <i>Slc20a1</i> | CAGCAGCACACAACGAAAAT  |
| Snta1_nc_F   | <i>Snta1</i>   | CCTCAAGAAGACAGGCAAGG  |
| Snta1_nc_R   | <i>Snta1</i>   | TTGGGGAAGGTTGAAAGAAA  |
| Csf1_nc_F    | <i>Csf1</i>    | GCAGGAGTATTGCCAAGGAG  |
| Csf1_nc_R    | <i>Csf1</i>    | CAGTGAGGAGAAGGCATGGT  |
| Per1_nc_F    | <i>Per1</i>    | AGCGCATCCACTCTGGTTAT  |
| Per1_nc_R    | <i>Per1</i>    | TGCCTCCCAAACCTCTCATCT |
| Arl4d_nc_F   | <i>Arl4d</i>   | GTTTAGGGGAAGGACCCAAA  |
| Arl4d_nc_R   | <i>Arl4d</i>   | CCTTAAAACGGCAGGTAGCA  |
| Ier3_nc_F    | <i>Ier3</i>    | TCGATCTGACGTTTCCCTCT  |
| Ier3_nc_R    | <i>Ier3</i>    | AAGATGATGGCGAACAGGAG  |
| Il15ra_nc_F  | <i>Il15ra</i>  | ACAACCTCCAGCCTCAAGTG  |
| Il15ra_nc_R  | <i>Il15ra</i>  | AGATGTCTCTGGCTCCCACA  |
| Pfkfb3_nc_F  | <i>Pfkfb3</i>  | CAACCGTGATTGTGATGGTG  |
| Pfkfb3_nc_R  | <i>Pfkfb3</i>  | CAGACCTGGCTTACCTTTCG  |
| Rnd3_nc_F    | <i>Rnd3</i>    | GTTGAGCCTGTGGGACACTT  |
| Rnd3_nc_R    | <i>Rnd3</i>    | CCTCAAGGAGCCACATTAGC  |
| Thbs1_nc_F   | <i>Thbs1</i>   | AGGTGTCCTGTTCTGTTCG   |
| Thbs1_nc_R   | <i>Thbs1</i>   | AGGAGAAGGGGGAGGAAAAT  |
| Lbp_nc_F     | <i>Lbp</i>     | GTCGTGGGCAGTACGAGTTT  |
| Lbp_nc_R     | <i>Lbp</i>     | CTGACCCAAGAGGTTTCCAG  |

**Table S4.** Primers for nascent transcript amplification by q-PCR.

## Hakim - Supplementary Table S5

|                         |                       | Bait (fixed point) |               |              |                     |
|-------------------------|-----------------------|--------------------|---------------|--------------|---------------------|
| Genome-wide correlation |                       | <i>Lcn2</i>        | <i>Arrdc2</i> | <i>Anxa5</i> | <i>Lcn2</i> in Hepa |
| A                       | Gene density: 4C -Dex | 0.288              | 0.350         | 0.169        | 0.254               |
| B                       | Gene density: 4C +Dex | 0.328              | 0.362         | 0.264        | 0.305               |
| C                       | Expression: 4C -Dex   | 0.225              | 0.236         | 0.182        | 0.147               |
| D                       | Expression: 4C +Dex   | 0.240              | 0.230         | 0.225        | 0.201               |
| E                       | GR binding: 4C +Dex   | 0.226              | 0.275         | 0.214        | 0.171               |
| F                       | DHS: 4C -Dex          | 0.391              | 0.474         | 0.286        | 0.302               |
| G                       | DHS: 4C +Dex          | <b>0.436</b>       | <b>0.502</b>  | <b>0.385</b> | <b>0.370</b>        |

**Table S5.** Genome wide correlations of 4C contact profiles to gene density, expression, GR binding, and DHS profiles.

Genome-wide Pearson correlation coefficient between 4C profiles and each of the other profiles was calculated in a window of size 100 kb, sliding along the genome at 50 kb increments. For all the baits in the different cell lines, the highest correlation is found between 4C and DHS (bold).

Correlations:

A.4C before Dex induction to gene density.

B.4C after Dex induction to gene density.

C.4C before Dex induction to expression before Dex induction.

D.4C after Dex induction to expression after Dex induction.

E.4C after Dex induction to GR binding after Dex induction.

F.4C before Dex induction to DHS before Dex induction.

G.4C After Dex induction to DHS After Dex induction.

## Hakim - Supplementary Table S6

| Clone ID    | chromosome | from      | to        |
|-------------|------------|-----------|-----------|
| RP23-61N22  | 2          | 32059424  | 32315976  |
| RP24-157M4  | 8          | 126128372 | 126268396 |
| RP24-345G23 | 9          | 107836316 | 107976312 |
| RP23-326N15 | 12         | 105292186 | 105481531 |
| RP23-398J10 | 2          | 164438367 | 164638709 |
| RP23-330E15 | 2          | 157764571 | 157934900 |
| RP24-338B7  | 2          | 141153253 | 141309830 |
| RP23-137O23 | 15         | 20234277  | 20430707  |
| RP23-298N20 | 15         | 101957990 | 102103632 |
| RP24-285P5  | 12         | 85975822  | 86128109  |

**Table S6.** BACs that were used as DNA FISH probes. Genomic position in mm8 coordinates is indicated.
